# Supplementary material for: Multi-omics Perspective on the Tumor Microenvironment based on PD-L1 and CD8 T-Cell Infiltration in Urothelial Cancer
Source: PubMed Central journal article supplement — J Cancer. 2019 Jan 1;10(3):697–707. doi: 10.7150/jca.28494 (PMC6360411; doi:10.7150/jca.28494), 2019-01-01
Supplement: jcav10p0697s1.pdf [file jcav10p0697s1.pdf]

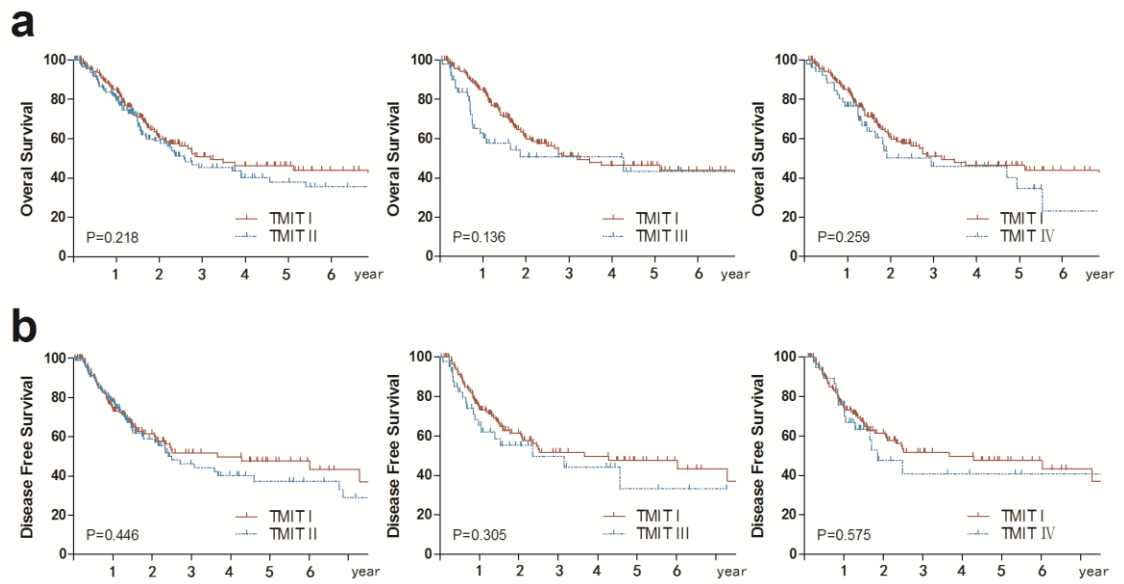

**Fig.S1** Kaplan-Meier survival curves of urothelial cancer patients according to TIMTs. **(a)** overall survival; **(b)** disease free survival.

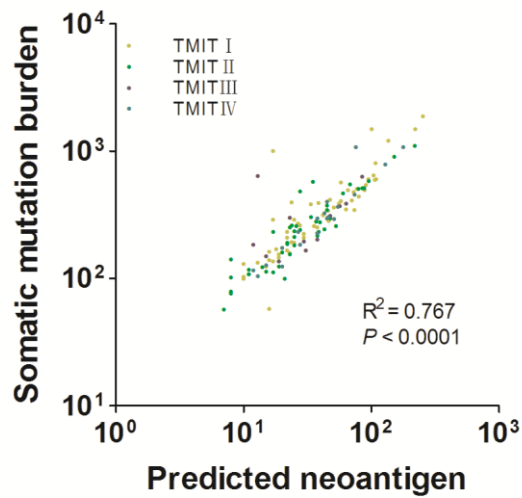

**Fig.S2** Significant correlation between somatic mutation burden and predicted neoantigen.

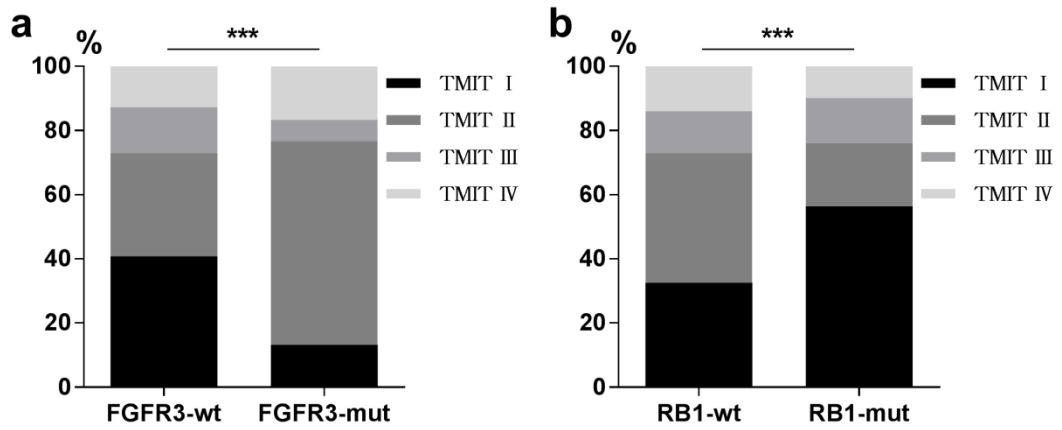

**Fig.S3** (a) Comparison of the proportion of TMIT I according to FGFR3 mutation status. (b) Comparison of the proportion of TMIT I according to RB1 mutation status.

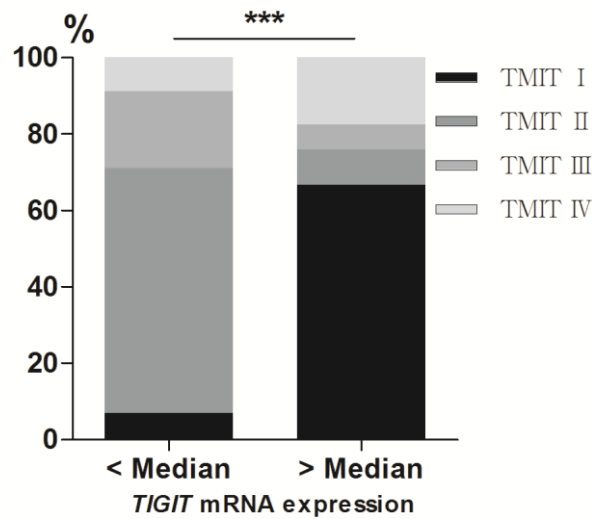

**Fig.S4** Comparison of the proportion of TMIT I according to TIGIT mRNA expression.
